# Supplementary material for: Evolution of Variable Number Tandem Repeats and Its Relationship with Genomic Diversity in Salmonella Typhimurium
Source: PubMed Central journal article supplement (PMC5183578; doi:10.3389/fmicb.2016.02002), 2016-12-26
Supplement: DataSheet1.pdf [file DataSheet1.pdf]

**Figure S1** The prevalence of 2-15-8-10-212 and its related MLVA types between 2012 and 2014

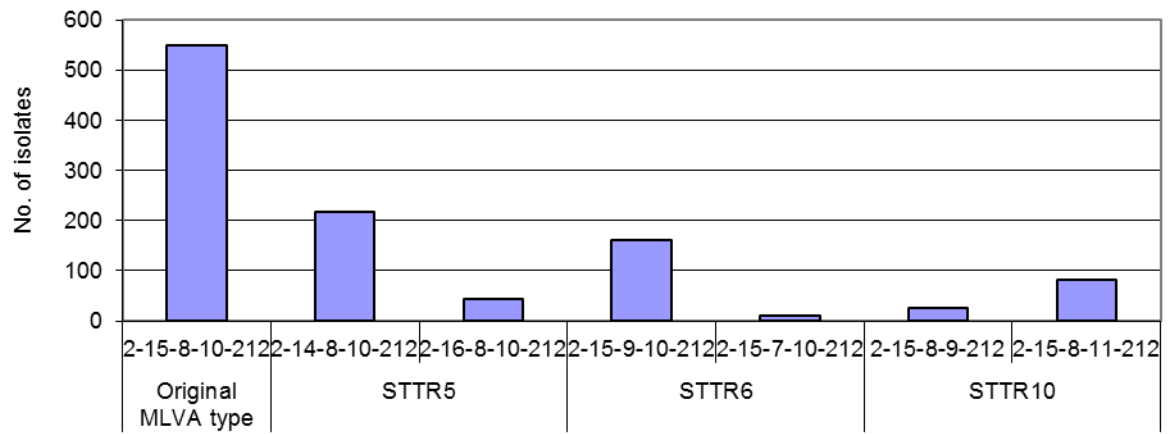

**Figure S2** Maximum parsimony tree of *S. Typhimurium* genomes of 2-15-8-10-212 and its related MLVA types, which was based on single nucleotide polymorphisms (SNPs) identified by mapping to the reference genome of *S. Typhimurium* LT2. The MLVA type 2-12-10-10-212 (strain L1880) was used as background isolates. Scale bar indicates the number of SNPs.

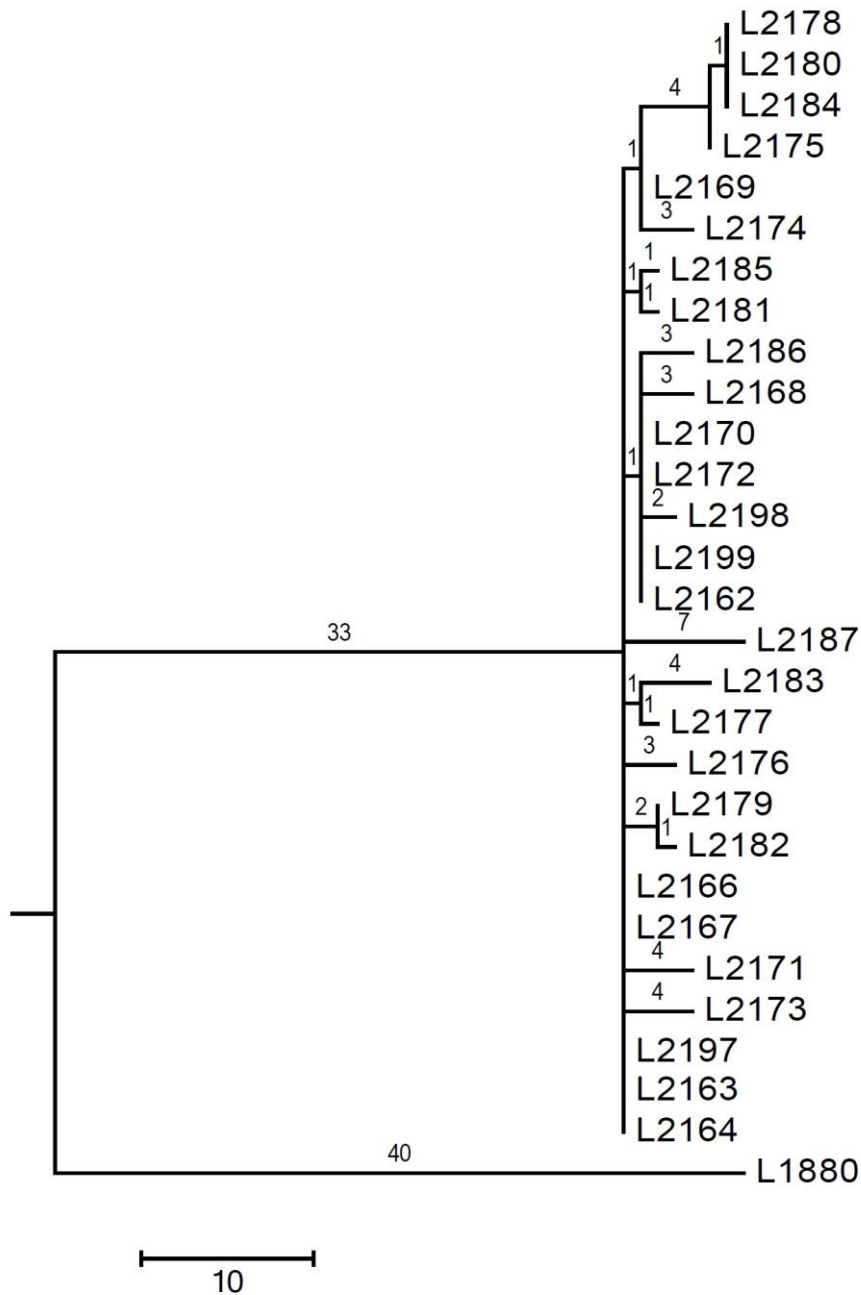

**Figure S3** Negative log likelihood surface with contours. The figure was plotted using the following parameter:  $s = 48$ ,  $v = 7$ ,  $n = 27$ . The surface was computed as  $-\log[P(v, s; \lambda, r)]$  which was reparametrised the model with  $\lambda$  and  $r = \lambda/\mu$ . The smallest number in the log likelihood surface indicated the values for  $\lambda$  and  $r$  in x-axis and y-axis ( $\lambda=6.57$ ,  $r=6.9$ ), respectively.

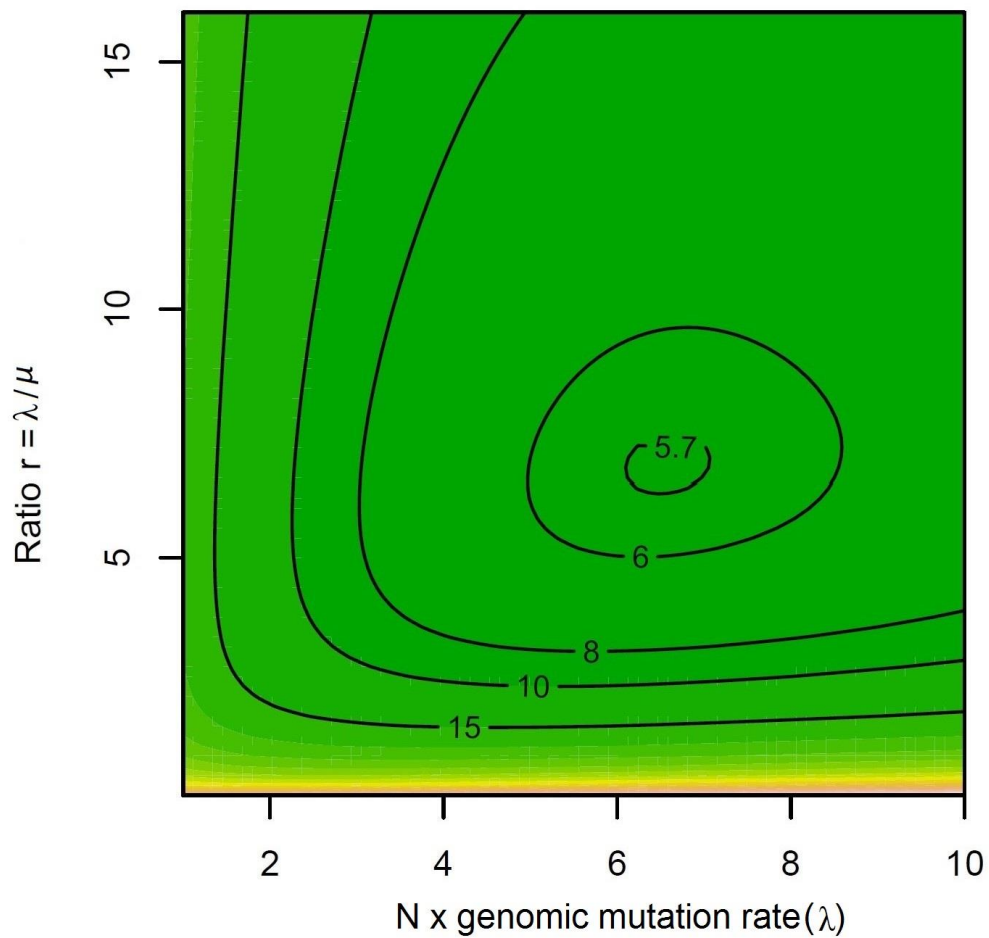

**Figure S4** Distribution of allele size in STTR1 (A), STTR7 (B), STTR8(C), STTR11 (D), STTR12 (E), and ST3 (F) among 206 *S. Typhimurium* strains. The data were obtained from Hiley et al. (2014).

(A)

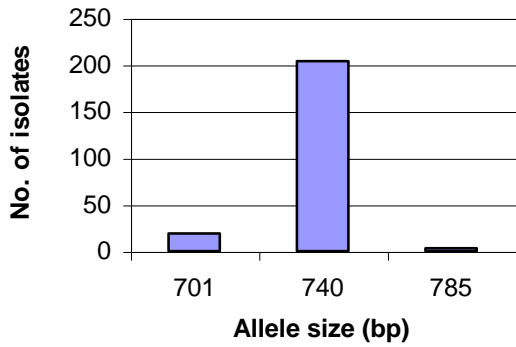

(B)

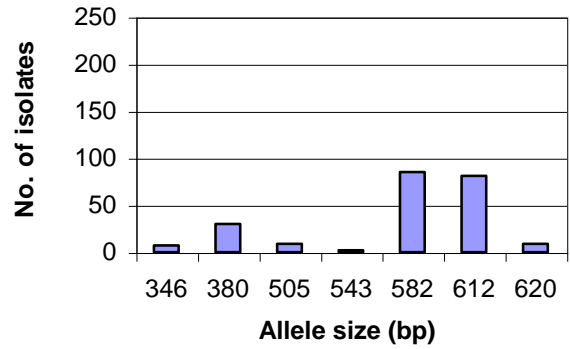

(C)

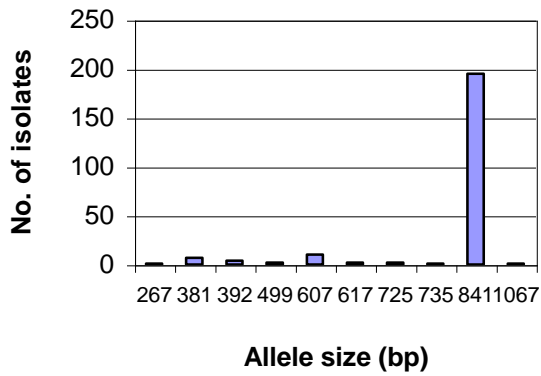

(D)

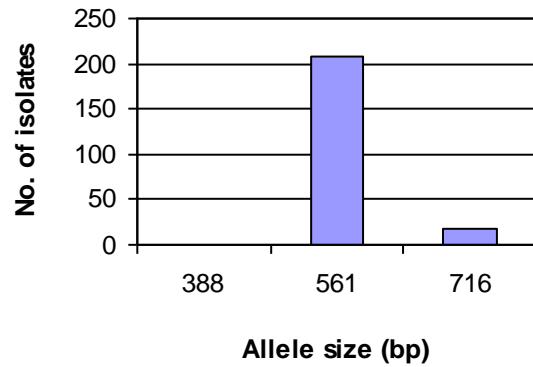

(E)

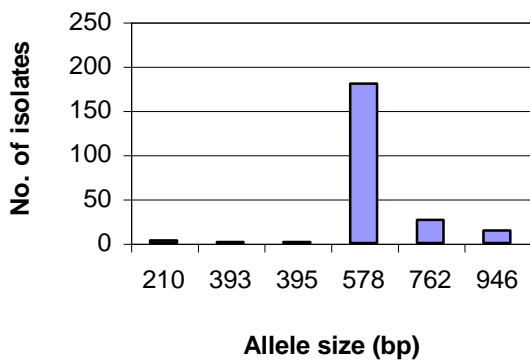

(F)

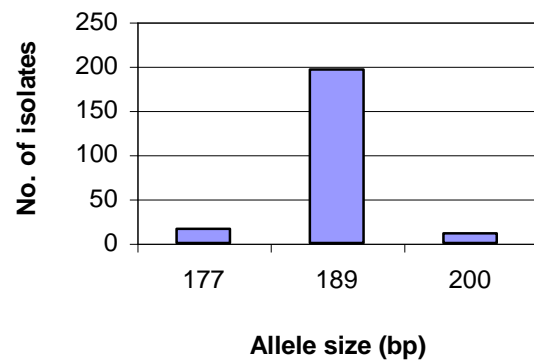

**Figure S5** Distribution of repeat unit in TR27 (A), TR41 (B), TR51(C), TR43 (D), among 215 *Salmonella Paratyphi A* strains. Other loci that have less than three alleles were excluded from analysis. The data were obtained from: Yao et al. (2014)

**(A) TR27**

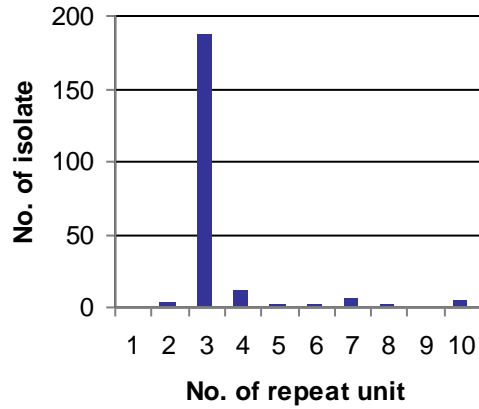

**(B) TR41**

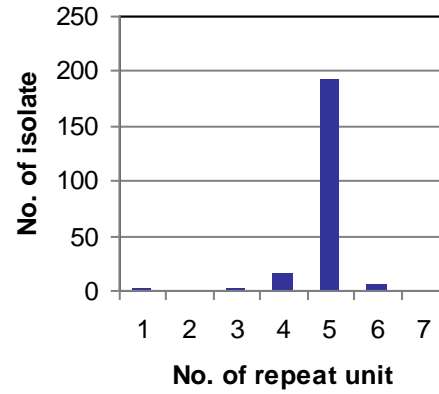

**(C) TR51**

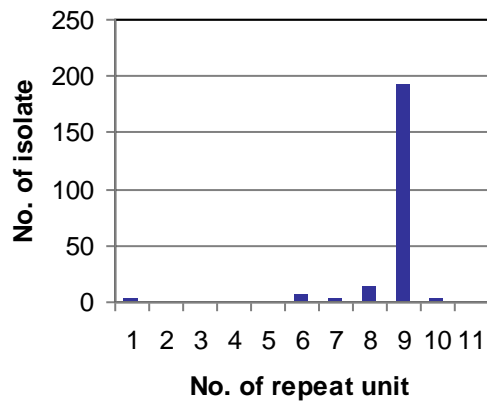

**(D) TR43**

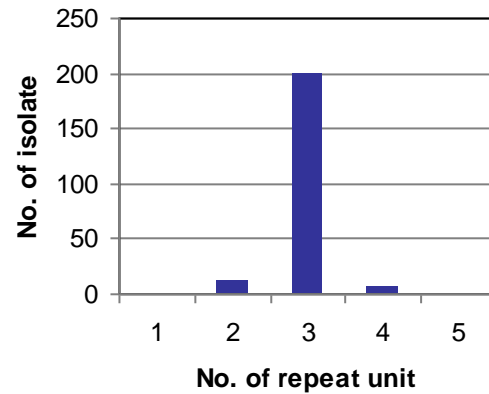

**Figure S6** Distribution of repeat unit in locus 292 (A), 25 (B), X3 (C), among 527 *Mycobacterium avium* strains. Other loci that have less than three alleles were excluded from analysis. The data was obtained from Ahlstrom et al. (2015).

**(A) Locus 292**

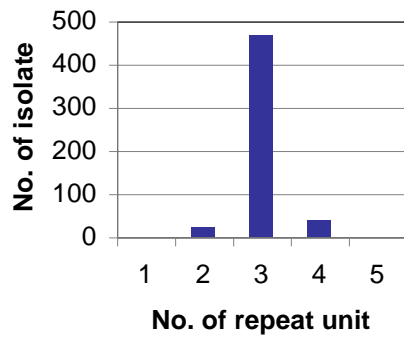

**(B) Locus 25**

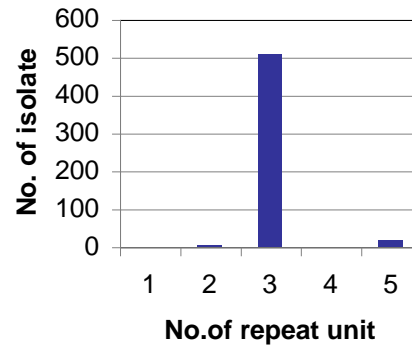

**(C) Locus X3**

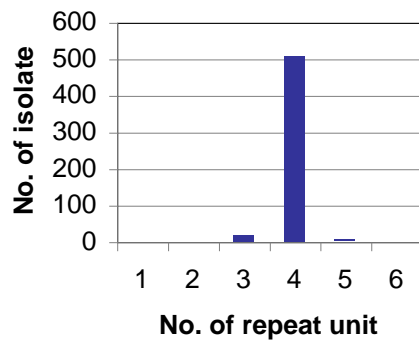

**Table S1 Selection of strains based on the match of isolation date**

| No. of groups | 2-15-8-10-212 |                | MLVA with one repeat difference |                |
|---------------|---------------|----------------|---------------------------------|----------------|
|               | strain        | Isolation date | strain                          | Isolation date |
| 1             | L2162         | 4/06/2012      | L2163                           | 24/06/2012     |
| 2             | L2198         | 3/08/2012      | L2164                           | 3/08/2012      |
|               | L2197         | 26/7/2012      |                                 |                |
|               | L2166         | 7/09/2012      |                                 |                |
| 3             | L2167         | 11/11/2012     | L2168                           | 22/11/2012     |
|               | L2199         | 19/12/2012     |                                 |                |
| 4             | L2170         | 16/02/2013     | L2169                           | 4/02/2013      |
|               | L2171         | 25/02/2013     |                                 |                |
| 5             | L2173         | 29/04/2013     | L2172                           | 15/04/2013     |
|               |               |                | L2174                           | 19/05/2013     |
| 6             | N/A           |                | L2175                           | 30/08/2013     |
| 7             | L2176         | 25/11/2013     | L2177                           | 25/11/2013     |
|               |               |                | L2178                           | 22/12/2013     |
| 8             | N/A           |                | L2179                           | 11/01/2014     |
| 9             | L2182         | 23/02/2014     | L2180                           | 27/01/2014     |
|               |               |                | L2181                           | 27/01/2014     |
|               |               |                | L2183                           | 26/02/2014     |
| 10            | N/A           |                | L2184                           | 11/03/2014     |
| 11            | L2187         | 29/04/2014     | L2185                           | 1/04/2014      |
|               |               |                | L2186                           | 23/04/2014     |

N/A: not applicable





|         |   |   |   |   |   |   |   |   |   |   |   |   |   |   |   |   |   |   |   |   |   |
|---------|---|---|---|---|---|---|---|---|---|---|---|---|---|---|---|---|---|---|---|---|---|
| 2377428 | C | . | . | . | . | . | . | . | . | . | . | . | . | . | . | G | . | . | . | . | . |
| 2406119 | C | . | . | . | . | . | . | . | . | . | . | . | . | . | . | . | . | . | T | . | . |
| 2489009 | G | . | . | . | . | . | . | . | . | . | . | . | . | . | . | . | . | . | . | . | T |
| 2689118 | T | . | . | . | . | . | . | . | . | . | . | . | . | . | . | . | . | G | . | . | . |
| 2716939 | G | . | . | . | . | . | . | . | . | . | . | . | . | . | . | T | . | . | . | . | . |
| 2786424 | A | . | . | . | . | G | . | . | . | G | . | . | . | . | . | . | . | . | . | . | . |
| 2908472 | T | . | . | C | . | . | . | . | . | . | . | . | . | . | . | . | . | . | . | . | . |
| 2919431 | A | . | . | . | . | . | . | . | . | . | G | . | G | . | . | . | . | . | . | . | . |
| 3064070 | T | . | . | . | . | C | . | . | . | . | . | . | . | . | . | . | . | . | . | . | . |
| 3307096 | G | . | . | . | . | T | . | . | . | . | . | . | . | . | . | . | . | . | . | . | . |
| 3491775 | C | . | . | . | . | . | . | . | . | A | . | . | . | . | . | . | . | . | . | . | . |
| 3495294 | T | . | . | . | . | . | . | . | . | . | . | . | . | . | . | . | . | C | . | . | . |
| 3502627 | C | . | . | . | . | . | . | . | . | . | . | . | . | . | . | . | . | A | . | . | . |
| 3505301 | G | . | . | . | . | . | . | . | . | . | . | . | . | . | . | . | . | C | . | . | . |
| 3528235 | C | . | . | . | . | . | . | . | . | T | . | . | . | . | . | . | . | . | . | . | . |
| 3561435 | T | . | . | . | . | T | . | . | C | . | . | . | . | . | . | . | . | . | . | . | . |
| 3844691 | C | . | . | . | . | . | . | . | . | . | . | . | . | . | T | . | . | . | . | . | . |
| 3983985 | G | . | . | . | . | . | . | . | . | . | . | . | . | . | . | A | . | . | . | . | . |
| 4012634 | A | . | . | . | . | A | . | . | G | . | . | . | . | . | . | . | . | . | . | . | . |
| 4026380 | C | . | A | . | . | . | . | . | . | . | . | . | . | . | . | . | . | . | . | . | . |
| 4143775 | C | . | . | . | . | . | . | . | . | . | . | . | . | . | . | . | . | . | T | . | . |
| 4273259 | C | . | . | . | . | . | . | . | . | . | . | A | . | . | A | . | . | . | . | . | . |
| 4348727 | C | . | . | . | . | T | . | . | . | . | . | . | . | . | . | . | . | . | . | . | . |
| 4810404 | C | . | T | . | . | . | . | . | . | . | . | . | . | . | . | . | . | . | . | . | . |
| 4818306 | C | . | . | . | . | . | . | . | . | . | . | . | . | . | . | . | . | . | . | . | T |

\* Dot indicates the identical nucleotide with 2163/2164/2166/2167/2197

Table S3 The dynamics of the number of MLVA types in 2010, 2011 and 2012 in Belgium

| MLVA Profile   | 2010 | 2011 | 2012 | Total |
|----------------|------|------|------|-------|
| 3-13-10-NA-211 | 41   | 25   | 18   | 84    |
| 3-12-10-NA-211 | 38   | 25   | 18   | 81    |
| 3-12-9-NA-211  | 28   | 17   | 28   | 73    |
| 3-12-11-NA-211 | 27   | 17   | 28   | 72    |
| 3-13-9-NA-211  | 12   | 11   | 19   | 42    |
| 3-13-8-NA-211  | 7    | 7    | 21   | 35    |
| 3-14-11-NA-311 | 11   | 15   | 7    | 33    |
| 3-15-11-NA-311 | 10   | 15   | 5    | 30    |
| 3-15-10-NA-311 | 6    | 12   | 10   | 28    |
| 3-15-12-NA-311 | 4    | 8    | 14   | 26    |
| 3-16-10-NA-311 | 14   | 4    | 7    | 25    |
| 3-12-8-NA-211  | 2    | 11   | 10   | 23    |
| 3-14-10-NA-311 | 15   | 4    | 0    | 19    |
| 3-14-10-NA-211 | 10   | 4    | 2    | 16    |
| 3-14-9-NA-211  | 5    | 4    | 7    | 16    |
| 3-8-9-NA-211   | 3    | 5    | 6    | 14    |
| 3-12-12-NA-211 | 2    | 4    | 7    | 13    |
| 3-12-10-NA-509 | 1    | 4    | 7    | 12    |
| 3-14-8-NA-211  | 3    | 1    | 7    | 11    |
| 3-17-11-NA-211 | 3    | 1    | 7    | 11    |
| 3-14-11-NA-211 | 1    | 7    | 2    | 10    |
| 3-17-11-NA-311 | 1    | 0    | 7    | 8     |
| 3-27-12-NA-311 | 1    | 0    | 7    | 8     |
| 3-5-11-NA-211  | 1    | 7    | 0    | 8     |
| 3-11-11-NA-211 | 2    | 3    | 1    | 6     |
| 3-9-7-8-211    | 5    | 1    | 0    | 6     |
| 4-9-10-10-111  | 1    | 5    | 0    | 6     |
| 3-14-12-NA-311 | 1    | 0    | 4    | 5     |
| 3-9-10-NA-211  | 1    | 3    | 1    | 5     |
| 2-12-7-9-212   | 3    | 0    | 1    | 4     |
| 3-10-8-9-211   | 1    | 3    | 0    | 4     |
| 3-13-13-16-311 | 4    | 0    | 0    | 4     |
| 3-13-7-NA-211  | 1    | 1    | 2    | 4     |
| 3-14-18-14-311 | 3    | 1    | 0    | 4     |
| 3-15-10-23-410 | 4    | 0    | 0    | 4     |
| 3-15-13-4-311  | 3    | 1    | 0    | 4     |
| 3-10-11-7-211  | 1    | 1    | 1    | 3     |
| 3-10-14-7-211  | 3    | 0    | 0    | 3     |
| 3-10-7-9-211   | 3    | 0    | 0    | 3     |
| 3-11-8-NA-211  | 3    | 0    | 0    | 3     |

|                |   |   |   |   |
|----------------|---|---|---|---|
| 3-12-15-17-311 | 1 | 1 | 1 | 3 |
| 3-12-7-NA-211  | 3 | 0 | 0 | 3 |
| 3-12-9-NA-NA   | 1 | 0 | 2 | 3 |
| 3-13-11-NA-211 | 3 | 0 | 0 | 3 |
| 3-13-8-NA-311  | 2 | 1 | 0 | 3 |
| 3-14-19-16-NA  | 3 | 0 | 0 | 3 |
| 3-15-10-23-311 | 3 | 0 | 0 | 3 |
| 3-15-12-14-311 | 1 | 0 | 2 | 3 |
| 3-15-8-NA-311  | 3 | 0 | 0 | 3 |
| 3-15-9-NA-311  | 1 | 1 | 1 | 3 |
| 3-16-9-NA-311  | 1 | 2 | 0 | 3 |
| 4-13-17-13-211 | 1 | 2 | 0 | 3 |
| 4-9-10-13-211  | 3 | 0 | 0 | 3 |
| 4-9-10-9-211   | 3 | 0 | 0 | 3 |
| 4-9-12-9-211   | 3 | 0 | 0 | 3 |
| 2-9-21-12-212  | 2 | 0 | 0 | 2 |
| 2-9-NA-12-212  | 1 | 1 | 0 | 2 |
| 3-10-7-NA-311  | 2 | 0 | 0 | 2 |
| 3-11-8-NA-310  | 2 | 0 | 0 | 2 |
| 3-11-NA-NA-211 | 2 | 0 | 0 | 2 |
| 3-12-18-26-NA  | 2 | 0 | 0 | 2 |
| 3-12-5-12-311  | 2 | 0 | 0 | 2 |
| 3-12-9-NA-310  | 2 | 0 | 0 | 2 |
| 3-13-10-NA-311 | 2 | 0 | 0 | 2 |
| 3-13-11-NA-311 | 2 | 0 | 0 | 2 |
| 3-13-12-NA-311 | 1 | 0 | 1 | 2 |
| 3-13-8-NA-NA   | 1 | 0 | 1 | 2 |
| 3-14-10-15-311 | 1 | 1 | 0 | 2 |
| 3-14-10-NA-210 | 2 | 0 | 0 | 2 |
| 3-14-14-22-311 | 1 | 0 | 1 | 2 |
| 3-14-16-14-311 | 2 | 0 | 0 | 2 |
| 3-14-16-23-311 | 1 | 1 | 0 | 2 |
| 3-14-19-12-311 | 1 | 1 | 0 | 2 |
| 3-14-19-16-311 | 2 | 0 | 0 | 2 |
| 3-14-8-NA-105  | 1 | 1 | 0 | 2 |
| 3-14-9-NA-311  | 2 | 0 | 0 | 2 |
| 3-15-10-NA-410 | 2 | 0 | 0 | 2 |
| 3-15-11-NA-211 | 2 | 0 | 0 | 2 |
| 3-15-11-NA-410 | 2 | 0 | 0 | 2 |
| 3-15-13-14-311 | 1 | 1 | 0 | 2 |
| 3-15-13-14-410 | 2 | 0 | 0 | 2 |
| 3-15-16-22-311 | 2 | 0 | 0 | 2 |

|                |   |   |   |   |
|----------------|---|---|---|---|
| 3-15-8-NA-211  | 1 | 1 | 0 | 2 |
| 3-16-16-28-311 | 2 | 0 | 0 | 2 |
| 3-16-2-NA-311  | 1 | 0 | 1 | 2 |
| 3-17-10-NA-311 | 2 | 0 | 0 | 2 |
| 3-18-10-NA-311 | 2 | 0 | 0 | 2 |
| 3-18-9-NA-211  | 1 | 1 | 0 | 2 |
| 4-10-16-10-211 | 2 | 0 | 0 | 2 |
| 4-14-10-7-211  | 1 | 1 | 0 | 2 |
| 6-8-15-NA-211  | 1 | 1 | 0 | 2 |
| 6-9-13-NA-211  | 2 | 0 | 0 | 2 |
| 3-13-19-15-311 | 1 | 0 | 0 | 1 |
| 1-10-11-7-NA   | 1 | 0 | 0 | 1 |
| 1-13-10-NA-112 | 1 | 0 | 0 | 1 |
| 1-13-NA-NA-14  | 1 | 0 | 0 | 1 |
| 1-14-15-22-311 | 1 | 0 | 0 | 1 |
| 1-15-10-23-410 | 1 | 0 | 0 | 1 |
| 2-10-20-8-312  | 1 | 0 | 0 | 1 |
| 2-11-11-10-411 | 1 | 0 | 0 | 1 |
| 2-11-11-11-312 | 1 | 0 | 0 | 1 |
| 2-12-17-11-212 | 1 | 0 | 0 | 1 |
| 2-12-6-9-212   | 1 | 0 | 0 | 1 |
| 2-12-7-8-212   | 1 | 0 | 0 | 1 |
| 2-13-18-7-212  | 1 | 0 | 0 | 1 |
| 2-14-9-9-212   | 1 | 0 | 0 | 1 |
| 2-15-NA-NA-105 | 1 | 0 | 0 | 1 |
| 2-16-12-9-105  | 1 | 0 | 0 | 1 |
| 2-20-12-12-212 | 1 | 0 | 0 | 1 |
| 2-6-4-8-212    | 1 | 0 | 0 | 1 |
| 2-7-10-9-210   | 1 | 0 | 0 | 1 |
| 2-7-11-9-309   | 1 | 0 | 0 | 1 |
| 3-10-12-NA-211 | 1 | 0 | 0 | 1 |
| 3-10-13-NA-211 | 1 | 0 | 0 | 1 |
| 3-10-15-7-211  | 1 | 0 | 0 | 1 |
| 3-10-7-10-211  | 1 | 0 | 0 | 1 |
| 3-10-NA-7-NA   | 1 | 0 | 0 | 1 |
| 3-11-10-NA-211 | 1 | 0 | 0 | 1 |
| 3-11-15-25-311 | 1 | 0 | 0 | 1 |
| 3-11-16-25-311 | 1 | 0 | 0 | 1 |
| 3-11-27-18-NA  | 1 | 0 | 0 | 1 |
| 3-11-3-NA-211  | 1 | 0 | 0 | 1 |
| 3-11-5-NA-111  | 1 | 0 | 0 | 1 |
| 3-11-6-8-211   | 1 | 0 | 0 | 1 |

|                |   |   |   |   |
|----------------|---|---|---|---|
| 3-11-8-8-211   | 1 | 0 | 0 | 1 |
| 3-11-9-NA-211  | 1 | 0 | 0 | 1 |
| 3-12-10-13-211 | 1 | 0 | 0 | 1 |
| 3-12-10-NA-310 | 1 | 0 | 0 | 1 |
| 3-12-15-NA-211 | 1 | 0 | 0 | 1 |
| 3-12-9-NA-311  | 1 | 0 | 0 | 1 |
| 3-13-10-NA-111 | 1 | 0 | 0 | 1 |
| 3-13-10-NA-310 | 1 | 0 | 0 | 1 |
| 3-13-13-15-311 | 1 | 0 | 0 | 1 |
| 3-13-13-16-NA  | 1 | 0 | 0 | 1 |
| 3-13-14-14-311 | 1 | 0 | 0 | 1 |
| 3-13-14-15-311 | 1 | 0 | 0 | 1 |
| 3-13-14-24-410 | 1 | 0 | 0 | 1 |
| 3-13-16-23-410 | 1 | 0 | 0 | 1 |
| 3-13-5-12-311  | 1 | 0 | 0 | 1 |
| 3-13-5-13-311  | 1 | 0 | 0 | 1 |
| 3-13-6-23-311  | 1 | 0 | 0 | 1 |
| 3-13-6-NA-211  | 1 | 0 | 0 | 1 |
| 3-13-NA-11-311 | 1 | 0 | 0 | 1 |
| 3-14-0-14-311  | 1 | 0 | 0 | 1 |
| 3-14-0-22-311  | 1 | 0 | 0 | 1 |
| 3-14-10-14-105 | 1 | 0 | 0 | 1 |
| 3-14-10-15-NA  | 1 | 0 | 0 | 1 |
| 3-14-10-24-211 | 1 | 0 | 0 | 1 |
| 3-14-12-25-211 | 1 | 0 | 0 | 1 |
| 3-14-12-NA-410 | 1 | 0 | 0 | 1 |
| 3-14-13-14-410 | 1 | 0 | 0 | 1 |
| 3-14-14-NA-311 | 1 | 0 | 0 | 1 |
| 3-14-15-14-311 | 1 | 0 | 0 | 1 |
| 3-14-16-22-410 | 1 | 0 | 0 | 1 |
| 3-14-17-24-311 | 1 | 0 | 0 | 1 |
| 3-14-18-15-311 | 1 | 0 | 0 | 1 |
| 3-14-19-13-311 | 1 | 0 | 0 | 1 |
| 3-14-20-12-212 | 1 | 0 | 0 | 1 |
| 3-14-22-14-311 | 1 | 0 | 0 | 1 |
| 3-14-6-NA-211  | 1 | 0 | 0 | 1 |
| 3-14-8-NA-310  | 1 | 0 | 0 | 1 |
| 3-14-9-NA-410  | 1 | 0 | 0 | 1 |
| 3-15-1-19-311  | 1 | 0 | 0 | 1 |
| 3-15-10-24-410 | 1 | 0 | 0 | 1 |
| 3-15-10-NA-105 | 1 | 0 | 0 | 1 |
| 3-15-11-NA-105 | 1 | 0 | 0 | 1 |

|                |   |   |   |   |
|----------------|---|---|---|---|
| 3-15-12-NA-211 | 1 | 0 | 0 | 1 |
| 3-15-12-NA-NA  | 1 | 0 | 0 | 1 |
| 3-15-13-15-311 | 1 | 0 | 0 | 1 |
| 3-15-13-NA-510 | 1 | 0 | 0 | 1 |
| 3-15-14-24-311 | 1 | 0 | 0 | 1 |
| 3-15-8-12-311  | 1 | 0 | 0 | 1 |
| 3-15-9-NA-410  | 1 | 0 | 0 | 1 |
| 3-15-NA-NA-111 | 1 | 0 | 0 | 1 |
| 3-16-10-NA-410 | 1 | 0 | 0 | 1 |
| 3-16-11-NA-311 | 1 | 0 | 0 | 1 |
| 3-16-11-NA-410 | 1 | 0 | 0 | 1 |
| 3-16-12-14-311 | 1 | 0 | 0 | 1 |
| 3-17-10-NA-410 | 1 | 0 | 0 | 1 |
| 3-17-9-NA-211  | 1 | 0 | 0 | 1 |
| 3-19-5-NA-311  | 1 | 0 | 0 | 1 |
| 3-23-NA-NA-311 | 1 | 0 | 0 | 1 |
| 3-8-15-21-NA   | 1 | 0 | 0 | 1 |
| 3-9-6-8-11     | 1 | 0 | 0 | 1 |
| 3-9-8-9-211    | 1 | 0 | 0 | 1 |
| 4-10-12-10-211 | 1 | 0 | 0 | 1 |
| 4-11-11-7-211  | 1 | 0 | 0 | 1 |
| 4-13-9-NA-211  | 1 | 0 | 0 | 1 |
| 4-14-15-8-211  | 1 | 0 | 0 | 1 |
| 4-15-6-7-211   | 1 | 0 | 0 | 1 |
| 4-16-14-8-211  | 1 | 0 | 0 | 1 |
| 4-17-17-7-211  | 1 | 0 | 0 | 1 |
| 4-22-12-7-211  | 1 | 0 | 0 | 1 |
| 4-8-12-8-211   | 1 | 0 | 0 | 1 |
| 4-8-12-9-211   | 1 | 0 | 0 | 1 |
| 4-8-13-8-211   | 1 | 0 | 0 | 1 |
| 5-10-11-9-211  | 1 | 0 | 0 | 1 |
| 5-9-19-9-211   | 1 | 0 | 0 | 1 |
| 5-9-6-9-211    | 1 | 0 | 0 | 1 |
| 6-8-15-NA-211  | 1 | 1 | 0 | 2 |
| 6-9-13-NA-211  | 2 | 0 | 0 | 2 |

---
